# Supplementary material for: Genomic evidence of adaptive evolution in emergent Vibrio parahaemolyticus ecotypes
Source: Oxford University Press journal article supplement (doi:10.12952/journal.elementa.000117), 2016-01-01
Supplement: elementa_000117_s001.docx [file elementa_000117_s001.docx]

**Table S1. List of the 30 *Vibrio parahaemolyticus* genomes examined in this study.**

| **Isolate** | **Source** | **Country** | **Year** | **STa** | ***tdh*/*trh*** | **Accession #** | **Reference** |
| --- | --- | --- | --- | --- | --- | --- | --- |
| VP551 | water | United States | 2007 | 3 | +/– | AOOV00000000 | this study |
| 863 | plankton | United States | 2007 | 3 | +/– | AOOY00000000 | this study |
| 930 | oyster | United States | 2007 | 3 | +/– | AOOZ00000000 | this study |
| AN-5034 | clinical | Bangladesh | 1998 | 3 | +/– | ACFO00000000 | (Chen et al., 2011) |
| K5030 | clinical | India | 2005 | 3 | +/– | ACKB00000000 | (Chen et al., 2011) |
| Peru-466 | clinical | Peru | 1996 | 3 | +/– | ACFM00000000 | (Chen et al., 2011) |
| RIMD2210633 | clinical | Thailand | 1996 | 3 | +/– | BA000031.2 BA000032.2 | (Makino et al., 2003) |
| 846 | oyster | United States | 2007 | 36 | +/+ | AOOX00000000 | this study |
| 3324 | clinical | United States | 2007 | 36 | +/+ | AOPA00000000 | this study |
| 10329 | clinical | United States | 1998 | 36 | +/+ | AFBW00000000 | (González-Escalona et al., 2011) |
| 12315 | clinical | United States | 2006 | 36 | +/+ | AOPF00000000 | this study |
| 97-10290 | clinical | United States | 1997 | 36 | +/+ | AOOU00000000 | this study |
| EN2910 | clinical | United States | 2000 | 36 | +/+ | AOPH00000000 | this study |
| EN9701173 | clinical | United States | 1997 | 36 | +/+ | AOPK00000000 | this study |
| EN9901310 | clinical | United States | 1999 | 36 | +/+ | AOPL00000000 | this study |
| 3644 | clinical | United States | 2007 | 43 | +/+ | AOPD00000000 | this study |
| EN9701072 | clinical | United States | 1997 | 43 | +/+ | AOPI00000000 | this study |
| EN9701121 | clinical | United States | 1997 | 50 | +/+ | AOPJ00000000 | this study |
| 3355 | clinical | United States | 2007 | 65 | –/+ | AOPB00000000 | this study |
| AQ3810 | clinical | Singapore | 1983 | 87 | +/– | AAWQ00000000 | (Boyd et al., 2008) |
| BB22OP | clinical | Bangladesh | 1980s | 88 | +/– | NC_019955.1 NC_019971.1 | (Jensen et al., 2013) |
| AQ4037 | clinical | Maldives | 1985 | 96 | –/+ | ACFN00000000 | (Chen et al., 2011) |
| VP766 | plankton | United States | 2007 | 133 | –/– | AOOW00000000 | this study |
| 901128 | clinical | United States | 1997 | 135 | –/– | AOPG00000000 | this study |
| 49 | oyster | United States | 2007 | 137 | –/– | AONA00000000 | this study |
| 3631 | clinical | United States | 2007 | 417 | –/+ | AOPC00000000 | this study |
| 3646 | clinical | United States | 2007 | 417 | –/+ | AOPE00000000 | this study |
| PCV08-7 | seafood | Malaysia | 2008 | 808 | +/– | AOCL00000000 | (Tiruvayipati et al., 2013) |
| V110 | shrimp | Hong Kong | 2010 | 809 | –/– | NZ_AQPJ00000000 | (Liu and Chen, 2013) |
| SNUVpS-1 | bivalve | Korea | 2009 | 917 | –/– | AMRZ00000000 | (Jun et al., 2013) |

aEcotypes classified by a 7-loci MLST scheme abbreviated as ST (González-Escalona et al., 2008).

**References**

Boyd EF, Cohen AL, Naughton LM, Ussery DW, Binnewies TT, et al. 2008. Molecular analysis of the emergence of pandemic *Vibrio parahaemolyticus*. *BMC Microbiol* **8**: 110. doi:10.1186/1471-2180-8-110.

Chen Y, Stine OC, Badger JH, Gil AI, Nair GB, et al. 2011. Comparative genomic analysis of *Vibrio parahaemolyticus*: serotype conversion and virulence. *BMC Genomics* **12**: 294. doi:10.1186/1471-2164-12-294.

González-Escalona N, Martinez-Urtaza J, Romero J, Espejo RT, Jaykus LA, et al. 2008. Determination of molecular phylogenetics of *Vibrio parahaemolyticus* strains by multilocus sequence typing. *J Bacteriol* **190**(8): 2831-2840. doi:10.1128/JB.01808-07.

González-Escalona N, Strain EA, De Jesus AJ, Jones JL, Depaola A. 2011. Genome sequence of the clinical O4:K12 serotype *Vibrio parahaemolyticus* strain 10329. *J Bacteriol* **193**(13): 3405-3406. doi:10.1128/JB.05044-11.

Jensen RV, Depasquale SM, Harbolick EA, Hong T, Kernell AL, et al. 2013. Complete genome sequence of prepandemic *Vibrio parahaemolyticus* BB22OP. *Genome Announc* **1**(1). doi:10.1128/genomeA.00002-12.

Jun JW, Kim JH, Choresca CH, Shin SP, Han JE, et al. 2013. Draft genome sequence of *Vibrio parahaemolyticus* SNUVpS-1 isolated from Korean seafood. *Genome Announc* **1**(1). doi:10.1128/genomeA.00132-12.

Liu M, Chen S. 2013. Draft genome sequence of *Vibrio parahaemolyticus* V110, isolated from shrimp in Hong Kong. *Genome Announc* **1**(3). doi:10.1128/genomeA.00300-13.

Makino K, Oshima K, Kurokawa K, Yokoyama K, Uda T, et al. 2003. Genome sequence of *Vibrio parahaemolyticus*: a pathogenic mechanism distinct from that of *V. cholerae*. *The Lancet* **361**(9359): 743-749. doi:10.1016/s0140-6736(03)12659-1.

Tiruvayipati S, Bhassu S, Kumar N, Baddam R, Shaik S, et al. 2013. Genome anatomy of the gastrointestinal pathogen, *Vibrio parahaemolyticus* of crustacean origin. *Gut Pathog* **5**(1): 37. doi:10.1186/1757-4749-5-37.
