# Supplementary material for: Genomic evidence of adaptive evolution in emergent Vibrio parahaemolyticus ecotypes
Source: Oxford University Press journal article supplement (doi:10.12952/journal.elementa.000117), 2016-01-01
Supplement: elementa_000117_s003.docx [file elementa_000117_s003.docx]

**Table S3. List of 42 orthologsa unique to the ST3 ecotype.**

| **Locus tag** | **Product** | **Length (aa)** | **Predicted functionb** |
| --- | --- | --- | --- |
| VP0394 | Hemagglutinin-associated protein | 221 | N6 adenine-specific DNA methyltransferase |
| VP0401 | Hypothetical protein | 529 | None predicted |
| VP1072 | Helicase | 607 | ATP-binding DNA helicase |
| VP1561 | Bacteriophage f237 ORF8 | 497 | NA |
| VP1564 | Hypothetical protein | 488 | None predicted |
| **VP1790** | **Hypothetical protein** | **134** | **Mss4-like centromere protein V** |
| **VP1791** | **Hypothetical protein** | **171** | **None predicted** |
| **VP1796** | **Hypothetical protein** | **281** | **None predicted** |
| **VP1798** | **Hypothetical protein** | **119** | **Glyoxalase-like domain** |
| **VP1801** | **Hypothetical protein** | **156** | **Transmembrane, helix** |
| **VP1808** | **Hypothetical protein** | **226** | **Tetratricopeptide domain** |
| **VP1812** | **Hypothetical protein** | **355** | **Toll interleukin-1 receptor (TIR) domain** |
| **VP1813** | **Hypothetical protein** | **129** | **Signal peptide** |
| **VP1823** | **Hypothetical protein** | **389** | **Coil** |
| **VP1824** | **Hypothetical protein** | **216** | **Helix, transmembrane** |
| **VP1829** | **RelB protein** | **94** | **ReIB antitoxin of toxin/antitoxin system** |
| **VP1830** | **RelE protein** | **92** | **RelE toxin of toxin/antitoxin system** |
| **VP1835** | **Hypothetical protein** | **130** | **None predicted** |
| **VP1840** | **Hypothetical protein** | **199** | **None predicted** |
| **VP1841** | **Hypothetical protein** | **212** | **None predicted** |
| **VP1845** | **Hypothetical protein** | **224** | **None predicted** |
| **VP1848** | **Hypothetical protein** | **224** | **Coil, transmembrane, helix** |
| **VP1850** | **Acetyltransferase** | **142** | **Acyl-CoA N-acetyltransferase** |
| **VP1853** | **Hypothetical protein** | **275** | **Conserved CHP02391 protein** |
| **VP1854** | **Hypothetical protein** | **135** | **None predicted** |
| **VP1858** | **Hypothetical protein** | **59** | **DUF645** |
| **VP1861** | **Hypothetical protein** | **175** | **Acyl-CoA N-acetyltransferase** |
| VP2134 | Hypothetical protein | 406 | None predicted |
| VP2135 | Phage-like protein | 721 | None predicted |
| VP2138 | Hypothetical protein | 339 | Coil |
| VP2905 | Hypothetical protein | 788 | Coil, helix, transmembrane |
| VP2908 | Hypothetical protein | 881 | None predicted |
| VP2909 | Hypothetical protein | 534 | DNA recombinase |
| VP2910 | Hypothetical protein | 423 | DNA recombinase |
| VPA0439 | Hypothetical protein | 211 | None predicted |
| VPA0891 | Hypothetical protein | 349 | Helix, transmembrane |
| VPA0898 | Hypothetical protein | 128 | None predicted |
| VPA1256 | Hypothetical protein | 534 | None predicted |
| VPA1260 | Hypothetical | 214 | None predicted |
| VPA1262 | Hypothetical protein | 1104 | None predicted |
| VPA1301 | Hypothetical protein | 682 | Pentapeptide repeat |
| VPA1585 | Hypothetical protein | 63 | None predicted |

aOrthologs located within the superintegron shown in bold font.

bFunction predicted by InterPro protein sequence analysis. Protein domains and signature matches given when a function was not predicted.
